# Supplementary material for: Protein profiling of alpha-fetoprotein producing gastric adenocarcinoma
Source: PubMed Central journal article supplement (PMC5053738; doi:10.18632/oncotarget.8571), 2016-04-04
Supplement: oncotarget-07-28448-s001.pdf [file oncotarget-07-28448-s001.pdf]

SUPPLEMENTARY FIGURE AND TABLES

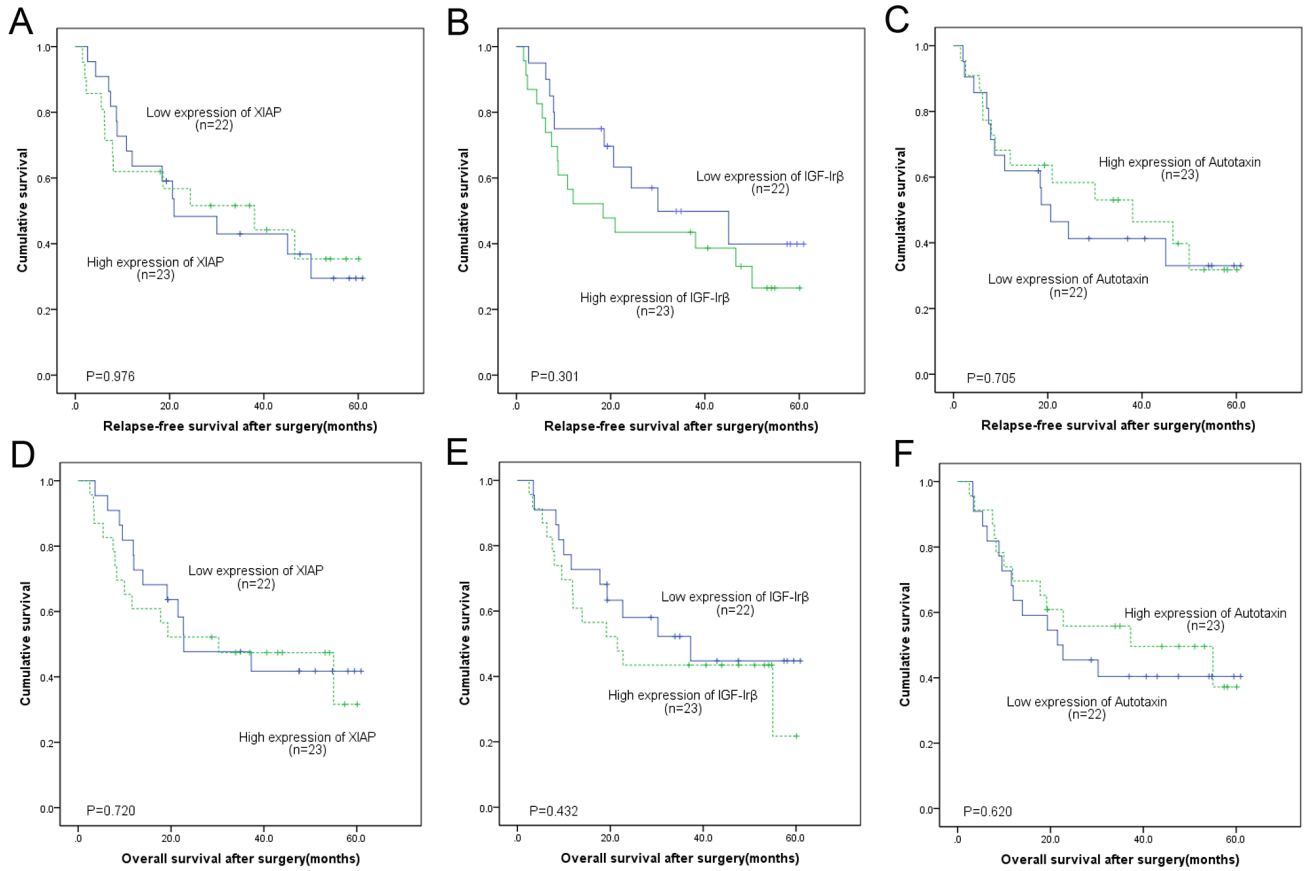

Supplementary Figure S1: In AFP non-producing group, the Kaplan–Meier and log-rank survival analysis of the relapse-free survival A-C. and overall survival D-F. showed that the group with high level expression of XIAP (A, D), IGF-Irβ (B, E) and Autotaxin(C, F) was not associated with poor prognosis.

Supplementary Table 1: Univariate Cox analyses of predictive factors for relapse-free survival in 77 gastric cancer patients

| Variables                | B      | p value | HR    | 95.0% CI |       |
|--------------------------|--------|---------|-------|----------|-------|
|                          |        |         |       | Lower    | Upper |
| Sex                      | 0.589  | 0.066   | 1.802 | 0.962    | 3.372 |
| Age at operation         | -0.006 | 0.617   | 0.994 | 0.971    | 1.018 |
| Drink                    | -0.030 | 0.926   | 0.971 | 0.520    | 1.812 |
| Smoke                    | -0.194 | 0.509   | 0.824 | 0.464    | 1.464 |
| Family history of cancer | -0.484 | 0.171   | 0.616 | 0.308    | 1.233 |
| Tumor location           | 0.073  | 0.681   | 1.075 | 0.761    | 1.519 |
| Gastrectomy              | -0.080 | 0.787   | 0.923 | 0.516    | 1.652 |
| Histological grade       | -0.154 | 0.638   | 0.857 | 0.452    | 1.627 |
| Tumor size               | -0.041 | 0.502   | 0.960 | 0.851    | 1.082 |
| Lymph node metastasis    | 1.013  | 0.033*  | 2.754 | 1.087    | 6.974 |
| TNM stage                | 0.441  | 0.004*  | 1.553 | 1.153    | 2.093 |
| Vascular invasion        | -0.461 | 0.330   | 0.631 | 0.250    | 1.593 |
| AFP positive             | 0.622  | 0.033*  | 1.863 | 1.053    | 3.297 |

Statistically significant as an independent predictor of survival (\*p<0.05)

B, regression coefficients; HR, hazard ratio; CI, confidence interval

**Supplementary Table 2: Univariate Cox analyses of predictive factors for overall survival in 77 gastric cancer patients**

| Variables                | B      | p value | HR    | 95.0% CI |        |
|--------------------------|--------|---------|-------|----------|--------|
|                          |        |         |       | Lower    | Upper  |
| Sex                      | 0.345  | 0.284   | 1.412 | 0.751    | 2.656  |
| Age at operation         | -0.005 | 0.664   | 0.995 | 0.972    | 1.018  |
| Drink                    | 0.014  | 0.964   | 1.014 | 0.548    | 1.877  |
| Smoke                    | -0.152 | 0.593   | 0.859 | 0.491    | 1.502  |
| Family history of cancer | -0.381 | 0.207   | 0.683 | 0.377    | 1.235  |
| Tumor location           | 0.154  | 0.595   | 1.166 | 0.661    | 2.058  |
| Gastrectomy              | -0.097 | 0.731   | 0.908 | 0.523    | 1.576  |
| Histological grade       | -0.198 | 0.539   | 0.820 | 0.436    | 1.543  |
| Tumor size               | -0.028 | 0.630   | 0.972 | 0.866    | 1.091  |
| Lymph node metastasis    | 0.995  | 0.035*  | 2.704 | 1.071    | 6.825  |
| Curative surgery         | 1.672  | 0.000*  | 5.323 | 2.282    | 12.418 |
| TNM stage                | 0.691  | 0.000*  | 1.996 | 1.409    | 2.827  |
| Vascular invasion        | -0.476 | 0.313   | 0.621 | 0.247    | 1.565  |
| AFP positive             | -0.695 | 0.014*  | 0.499 | 0.287    | 0.866  |

Statistically significant as an independent predictor of survival (\*p<0.05)

B, regression coefficients; HR, hazard ratio; CI, confidence interval

**Supplementary Table 3: Proteins differentially expressed between AFP positive and non-positive gastric cancer tissues**

|                      | <b>Protein</b>         | <b>GENE ID</b> | <b>Fold change</b> | <b>q-value</b> | <b>p-value</b> |
|----------------------|------------------------|----------------|--------------------|----------------|----------------|
| <b>Up-regulated*</b> | cyclin D1(M-20)        | <b>CCND1</b>   | 4.422              | 0.000          | <b>0.000</b>   |
|                      | RANKL(FL-317)          | <b>TNFSF11</b> | 2.900              | 0.000          | <b>0.000</b>   |
|                      | LSD1 (1B2E5)           | <b>AOF2</b>    | 2.678              | 0.000          | <b>0.000</b>   |
|                      | Autotaxin(E-12)        | <b>ENPP2</b>   | 2.504              | 0.000          | <b>0.002</b>   |
|                      | Calpain 2              | <b>CAPN2</b>   | 2.471              | 0.000          | <b>0.000</b>   |
|                      | stat 3(C-20)           | <b>STAT3</b>   | 2.549              | 0.000          | <b>0.002</b>   |
|                      | XIAP(48/hILP)          | <b>XIAP</b>    | 2.313              | 0.000          | <b>0.002</b>   |
|                      | IGF-Irβ                | <b>IGF1R</b>   | 1.939              | 0.000          | <b>0.000</b>   |
|                      | Bcl-2(C-2)             | <b>BCL2</b>    | 1.837              | 0.000          | <b>0.001</b>   |
|                      | <b>Down-regulated*</b> | BID (C-20)     | <b>BID</b>         | 1.936          | 0.000          |
| ASC(N-15)-R          |                        | <b>ASC</b>     | 2.778              | 0.000          | <b>0.000</b>   |

\*The expression of the above listed proteins were either significantly up or down-regulated in AFP positive gastric cancer patients tissue

Statistically significant in unpaired t test ( $p < 0.05$ ) and SAM analysis ( $q < 5\%$ ).

Supplementary Table 4: Univariate Cox analyses of predictive factors for relapse-free survival in AFP positive 32 gastric cancer patients

| Variables                | B      | p value | HR    | 95.0% CI |       |
|--------------------------|--------|---------|-------|----------|-------|
|                          |        |         |       | Lower    | Upper |
| Sex                      | 0.984  | 0.058   | 2.676 | 0.967    | 7.405 |
| Age at operation         | -0.296 | 0.491   | 0.744 | 0.320    | 1.728 |
| Drink                    | -0.002 | 0.996   | 0.998 | 0.388    | 2.565 |
| Smoke                    | -0.120 | 0.778   | 0.887 | 0.383    | 2.050 |
| Family history of cancer | -0.307 | 0.468   | 0.735 | 0.321    | 1.687 |
| Tumor location           | -0.025 | 0.919   | 0.976 | 0.608    | 1.566 |
| Gastrectomy              | -0.162 | 0.708   | 0.850 | 0.365    | 1.982 |
| Histological grade       | -1.133 | 0.047*  | 0.322 | 0.106    | 0.984 |
| Tumor size               | -0.320 | 0.463   | 0.726 | 0.309    | 1.707 |
| Lymph node metastasis    | 0.254  | 0.099   | 1.289 | 0.953    | 1.744 |
| TNM stage                | 0.329  | 0.046*  | 1.390 | 1.097    | 2.000 |
| Vascular invasion        | 0.046  | 0.941   | 1.048 | 0.309    | 3.550 |
| cyclin D1(M-20)          | 0.300  | 0.485   | 1.350 | 0.582    | 3.132 |
| RANKL(FL-317)            | -0.455 | 0.290   | 0.634 | 0.273    | 1.474 |
| LSD1 (1B2E5)             | -0.129 | 0.764   | 0.879 | 0.379    | 2.039 |
| Autotaxin(E-12)          | 0.933  | 0.041*  | 2.543 | 1.039    | 6.226 |
| Calpain 2                | 0.256  | 0.551   | 1.291 | 0.558    | 2.988 |
| stat 3(C-20)             | 0.004  | 0.992   | 1.004 | 0.432    | 2.335 |
| XIAP(48/hILP)            | 1.023  | 0.022*  | 2.782 | 1.162    | 6.661 |
| IGF-Irβ                  | 0.992  | 0.031*  | 2.697 | 1.096    | 6.639 |
| Bcl-2(C-2)               | 0.179  | 0.678   | 1.196 | 0.513    | 2.788 |
| BID (C-20)               | 0.162  | 0.706   | 1.176 | 0.506    | 2.733 |
| ASC(N-15)-R              | -0.303 | 0.485   | 0.739 | 0.316    | 1.728 |

Statistically significant as an independent predictor of survival (\*p<0.05)

B, regression coefficients; HR, hazard ratio; CI, confidence interval

Supplementary Table 5: Univariate Cox analyses of predictive factors for Overall survival in AFP positive 32 gastric cancer patients

| Variables                | B      | p value | HR    | 95.0% CI |       |
|--------------------------|--------|---------|-------|----------|-------|
|                          |        |         |       | Lower    | Upper |
| Sex                      | 0.533  | 0.263   | 1.703 | 0.670    | 4.328 |
| Age at operation         | 0.002  | 0.886   | 1.002 | 0.972    | 1.033 |
| Drink                    | -0.096 | 0.828   | 0.908 | 0.381    | 2.167 |
| Smoke                    | 0.072  | 0.855   | 1.075 | 0.497    | 2.327 |
| Family history of cancer | -0.098 | 0.786   | 0.906 | 0.446    | 1.841 |
| Tumor location           | 0.088  | 0.696   | 1.091 | 0.703    | 1.694 |
| Gastrectomy              | -0.091 | 0.803   | 0.913 | 0.447    | 1.866 |
| Histological grade       | -1.048 | 0.038*  | 0.351 | 0.130    | 0.943 |
| Tumor size               | -0.099 | 0.238   | 0.906 | 0.769    | 1.067 |
| Lymph node metastasis    | 0.314  | 0.041*  | 1.368 | 1.012    | 1.849 |
| TNM stage                | 0.457  | 0.014*  | 1.579 | 1.096    | 2.274 |
| Vascular invasion        | -0.009 | 0.988   | 0.991 | 0.297    | 3.312 |
| cyclin D1(M-20)          | 0.308  | 0.436   | 1.360 | 0.627    | 2.950 |
| RANKL(FL-317)            | -0.576 | 0.147   | 0.562 | 0.258    | 1.223 |
| LSD1 (1B2E5)             | -0.137 | 0.555   | 0.872 | 0.554    | 1.374 |
| Autotaxin(E-12)          | 1.215  | 0.007*  | 3.371 | 1.401    | 8.115 |
| Calpain 2                | 0.396  | 0.316   | 1.486 | 0.685    | 3.223 |
| stat 3(C-20)             | -0.161 | 0.688   | 0.851 | 0.388    | 1.867 |
| XIAP(48/hILP)            | 0.979  | 0.016*  | 2.661 | 1.200    | 5.901 |
| IGF-Irβ                  | 0.927  | 0.033*  | 2.527 | 1.077    | 5.930 |
| Bcl-2(C-2)               | 0.432  | 0.275   | 1.541 | 0.709    | 3.347 |
| BID (C-20)               | 0.163  | 0.678   | 1.178 | 0.544    | 2.547 |
| ASC(N-15)-R              | -0.404 | 0.311   | 0.668 | 0.306    | 1.459 |

Statistically significant as an independent predictor of survival (\*p<0.05)

B, regression coefficients; HR, hazard ratio; CI, confidence interval

Supplementary Table 6: Univariate Cox analyses of predictive factors for relapse-free survival in 45 AFP non-positive gastric cancer patients

| Variables                | B      | p value | HR    | 95.0% CI |       |
|--------------------------|--------|---------|-------|----------|-------|
|                          |        |         |       | Lower    | Upper |
| Sex                      | 0.481  | 0.262   | 1.617 | 0.699    | 3.744 |
| Age at operation         | -0.005 | 0.767   | 0.995 | 0.961    | 1.030 |
| Drink                    | -0.072 | 0.867   | 0.931 | 0.403    | 2.150 |
| Smoke                    | -0.078 | 0.850   | 0.925 | 0.411    | 2.079 |
| Family history of cancer | -0.574 | 0.441   | 0.563 | 0.131    | 2.424 |
| Tumor location           | 0.128  | 0.614   | 1.136 | 0.692    | 1.867 |
| Gastrectomy              | 0.127  | 0.754   | 1.135 | 0.514    | 2.506 |
| Histological grade       | 0.492  | 0.234   | 1.635 | 0.728    | 3.673 |
| Tumor size               | 0.018  | 0.848   | 1.018 | 0.845    | 1.227 |
| Lymph node metastasis    | 0.426  | 0.017*  | 1.531 | 1.079    | 2.172 |
| TNM stage                | 0.672  | 0.010*  | 1.959 | 1.177    | 3.259 |
| Vascular invasion        | -0.947 | 0.199   | 0.388 | 0.092    | 1.644 |
| cyclin D1(M-20)          | 0.029  | 0.941   | 1.030 | 0.473    | 2.239 |
| RANKL(FL-317)            | -0.443 | 0.263   | 0.642 | 0.296    | 1.394 |
| LSD1 (1B2E5)             | -0.909 | 0.030*  | 0.403 | 0.177    | 0.914 |
| Autotaxin(E-12)          | -0.149 | 0.706   | 0.862 | 0.399    | 1.863 |
| Calpain 2                | 0.335  | 0.413   | 1.398 | 0.626    | 3.122 |
| stat 3(C-20)             | 0.456  | 0.261   | 1.578 | 0.712    | 3.494 |
| XIAP(48/hILP)            | -0.012 | 0.976   | 0.988 | 0.456    | 2.140 |
| IGF-Irβ                  | -0.416 | 0.304   | 0.660 | 0.298    | 1.459 |
| Bcl-2(C-2)               | -0.748 | 0.065   | 0.473 | 0.214    | 1.046 |
| BID (C-20)               | 0.522  | 0.206   | 1.685 | 0.751    | 3.783 |
| ASC(N-15)-R              | -0.057 | 0.885   | 0.944 | 0.434    | 2.056 |

Statistically significant as an independent predictor of survival (\*p<0.05)

B, regression coefficients; HR, hazard ratio; CI, confidence interval

Supplementary Table 7: Univariate Cox analyses of predictive factors for overall survival in 45 AFP non-positive gastric cancer patients

| Variables                | B      | p value | HR    | 95.0% CI |       |
|--------------------------|--------|---------|-------|----------|-------|
|                          |        |         |       | Lower    | Upper |
| Sex                      | 0.330  | 0.461   | 1.391 | 0.578    | 3.348 |
| Age at operation         | -0.005 | 0.793   | 0.995 | 0.960    | 1.031 |
| Drink                    | 0.077  | 0.862   | 1.080 | 0.451    | 2.590 |
| Smoke                    | -0.159 | 0.707   | 0.853 | 0.374    | 1.949 |
| Family history of cancer | -0.749 | 0.227   | 0.473 | 0.140    | 1.595 |
| Tumor location           | 0.251  | 0.358   | 1.285 | 0.753    | 2.195 |
| Gastrectomy              | 0.042  | 0.921   | 1.042 | 0.460    | 2.361 |
| Histological grade       | 0.440  | 0.305   | 1.553 | 0.669    | 3.602 |
| Tumor size               | 0.019  | 0.843   | 1.019 | 0.846    | 1.228 |
| Lymph node metastasis    | 0.515  | 0.010*  | 1.674 | 1.131    | 2.479 |
| TNM stage                | 1.085  | 0.003*  | 2.959 | 1.453    | 6.024 |
| Vascular invasion        | -0.885 | 0.232   | 0.413 | 0.097    | 1.759 |
| cyclin D1(M-20)          | 0.485  | 0.240   | 1.624 | 0.724    | 3.644 |
| RANKL(FL-317)            | -0.673 | 0.102   | 0.510 | 0.228    | 1.142 |
| LSD1 (1B2E5)             | -0.901 | 0.037*  | 0.406 | 0.174    | 0.945 |
| Autotaxin(E-12)          | -0.199 | 0.620   | 0.820 | 0.373    | 1.800 |
| Calpain 2                | 0.233  | 0.567   | 1.263 | 0.568    | 2.807 |
| stat 3(C-20)             | 0.423  | 0.301   | 1.526 | 0.685    | 3.399 |
| XIAP(48/hILP)            | 0.144  | 0.720   | 1.154 | 0.526    | 2.533 |
| IGF-Irβ                  | -0.316 | 0.434   | 0.729 | 0.330    | 1.610 |
| Bcl-2(C-2)               | -0.702 | 0.089   | 0.496 | 0.220    | 1.114 |
| BID (C-20)               | 0.325  | 0.426   | 1.385 | 0.621    | 3.086 |
| ASC(N-15)-R              | 0.014  | 0.973   | 1.014 | 0.457    | 2.251 |

Statistically significant as an independent predictor of survival (\*p<0.05)

B, regression coefficients; HR, hazard ratio; CI, confidence interval



Supplementary Table 8: Clinicopathological characteristics of high and low risk score groups in AFP producing gastric cancer

| Risk score                      | High risk | Low risk    | p value |
|---------------------------------|-----------|-------------|---------|
| cohort size                     | 16(50%)   | 16(50%)     | 0.7     |
| mean age(years)                 | 59±11.09  | 61.38±11.31 | 0.36    |
| Gender(M/F)                     | 13/3      | 13/3        | 0.70    |
| drink(Y/N)                      | 6/10      | 3/13        | 0.217   |
| Smoke(Y/N)                      | 8/8       | 7/9         | 0.5     |
| tumor size(cm)                  | 5.31±1.22 | 7.00±3.18   | 0.06    |
| nerve invasion(Y/N)             | 10/6      | 6/10        | 0.144   |
| vascular invasion(Y/N)          | 12/2      | 12/2        | 0.7     |
| <b>tumor site</b>               |           |             |         |
| Proximal(cardia or fundus)      | 6         | 6           | 0.7     |
| Distal(antrum or corpus)        | 10        | 10          |         |
| <b>TNM stage</b>                |           |             |         |
| Ib                              | 0         | 1           | 0.54    |
| IIb                             | 1         | 3           |         |
| IIIa                            | 1         | 1           |         |
| IIIb                            | 4         | 1           |         |
| IIIc                            | 7         | 8           |         |
| IV                              | 3         | 2           |         |
| <b>outcome</b>                  |           |             |         |
| Relapse(Y/N)                    | 16/0      | 11/5        | 0.022*  |
| <b>status at last follow up</b> |           |             |         |
| Deceased                        | 16        | 10          |         |
| Living                          | 0         | 6           | 0.009*  |

\*p&lt;0.05

Supplementary Table 9: Antibody targets specific for phosphorylation

| Antibody targets specific for phosphorylation |                                 |                                                       |                                     |                   |
|-----------------------------------------------|---------------------------------|-------------------------------------------------------|-------------------------------------|-------------------|
| p-AKT (Ser473)                                | p-ERK5<br>(Thr218/Tyr220)       | <b>p-P44/42 MAPK<br/>(Erk1/2)(Thr202/<br/>Tyr204)</b> | <b>p-PKCa/b II<br/>(Thr638/641)</b> | p-STAT 3 (Ser727) |
| p-b-Catenin<br>(Ser33/37/Thr41)               | p-FAK<br>(Tyr397)               | <b>p-P53<br/>(Ser392)</b>                             | <b>p-PKCδ<br/>(Thr505)</b>          | p-STAT5 (Tyr694)  |
| p-CDC2 (Tyr15)                                | <b>p-GSK-3a/b<br/>(Ser21/9)</b> | <b>p-P70 S6 kinase<br/>(Thr389)</b>                   | p-PTEN<br>(Ser380)                  |                   |
| p-c-Jun (Ser73)                               | p-JNK(G-7)                      | p-P90RSK (Ser380)                                     | <b>p-Rb<br/>(Ser780)</b>            |                   |
| p-CREB (Ser133)                               | p-Met (Tyr1234)                 | <b>p-PDK1 (Ser241)</b>                                | p-Rb<br>(Ser807/811)                |                   |
| p-eIF4B (Ser422)                              | p-P38 MAPK (Thr180/<br>Tyr182)  | <b>p-PKCa (Ser657)</b>                                | p-Smad1/5<br>(Ser463/465)           |                   |

Antibodies with detectable expression in samples of two groups are in bold.  $\beta$ -actin and glyceraldehyde-3- phosphate dehydrogenase(GAPDH) served as internal control.

\*Differentially expressed proteins between AFP producing and non-producing gastric cancer patients.

**Supplementary Table 10: Antibody targets specific for non-phosphorylation**

See Supplementary File 1
